# Supplementary material for: Oxidized Co–Sn nanoparticles as long-lasting anode materials for lithium-ion batteries
Source: Royal Society of Chemistry journal article supplement (doi:10.1039/c7nr07309g), 2018-01-01
Supplement: c7nr07309g1.pdf [file c7nr07309g1.pdf]

## Supporting Information for

### **Oxidized Co-Sn Nanoparticles as Long-Lasting Anode Materials for Lithium-Ion Batteries**

Marc Walter,<sup>a,b</sup> Simon Doswald,<sup>a,b</sup> Frank Krumeich,<sup>a</sup> Meng He,<sup>a,b</sup>  
Roland Widmer,<sup>c</sup> Nicholas P. Stadie,<sup>a,b, d</sup> and Maksym V.  
Kovalenko<sup>\*a,b</sup>

<sup>a</sup> Department of Chemistry and Applied Biosciences, ETH Zürich – Swiss Federal Institute of Technology Zürich, Vladimir Prelog Weg 1, 8093 Zürich (Switzerland)

<sup>b</sup> Empa-Swiss Federal Laboratories for Materials Science and Technology, Laboratory for thin films and photovoltaics, Überlandstrasse 129, 8600 Dübendorf (Switzerland)

<sup>c</sup> Empa-Swiss Federal Laboratories for Materials Science and Technology,  
Nanotech@surfaces Laboratory, Überlandstrasse 129, 8600 Dübendorf (Switzerland)

<sup>d</sup> Present address: Department of Chemistry and Biochemistry, Montana State University,  
59717 Montana (United States)

[\*] Prof. Dr. Maksym V. Kovalenko  
E-mail: mvkovalenko@ethz.ch

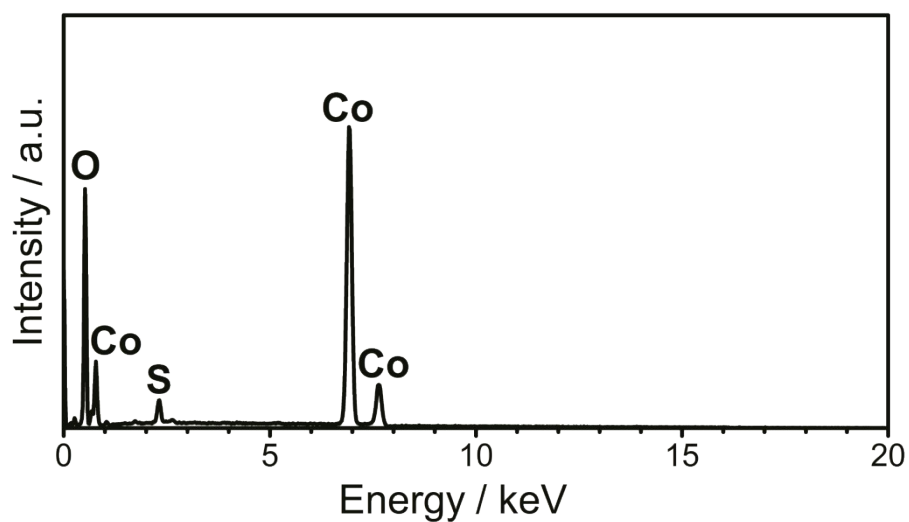

**Figure S1.** EDX spectrum of amorphous Co NPs. The peak denoted as S (corresponding to ~1 wt% of the sample) could be attributed to residual DMSO, left over after washing.

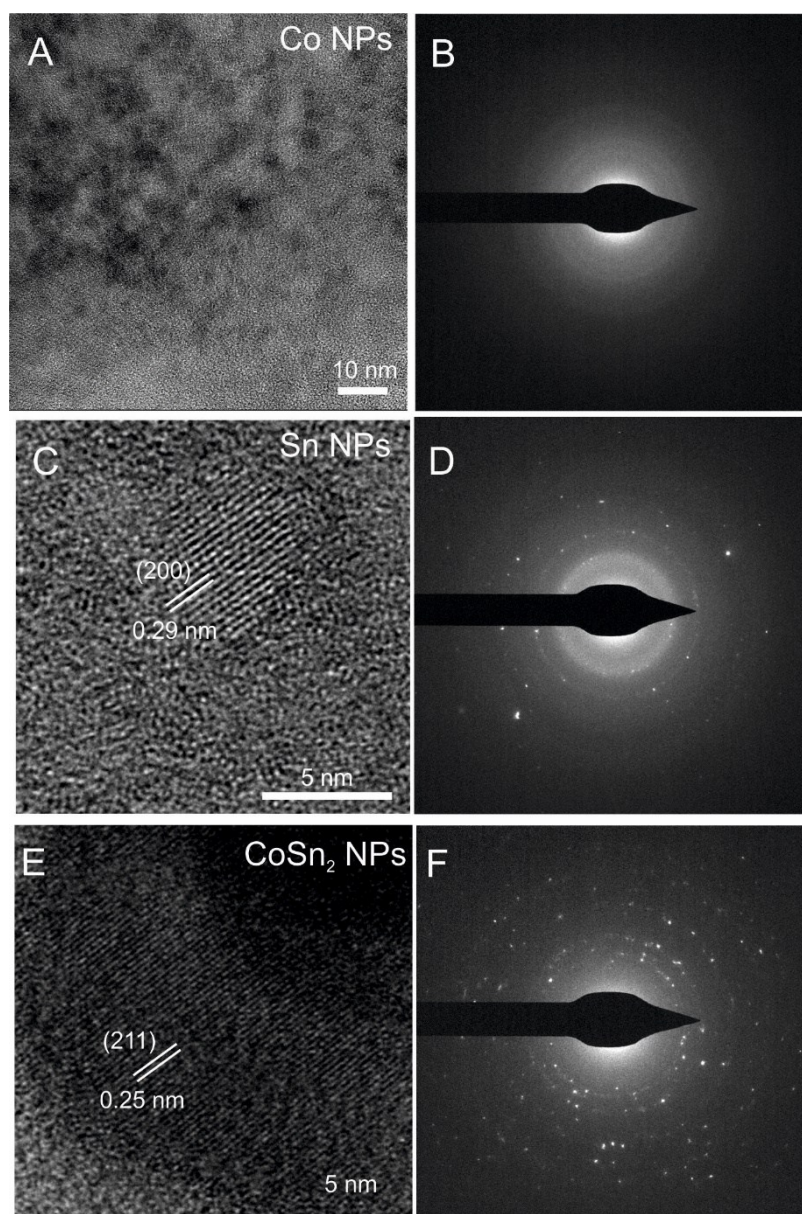

**Figure S2.** HR-TEM images along with selected area electron diffraction (SAED) and d-spacing of Co NPs (a, b), Sn NPs (c, d) and CoSn<sub>2</sub> NPs (e, f).

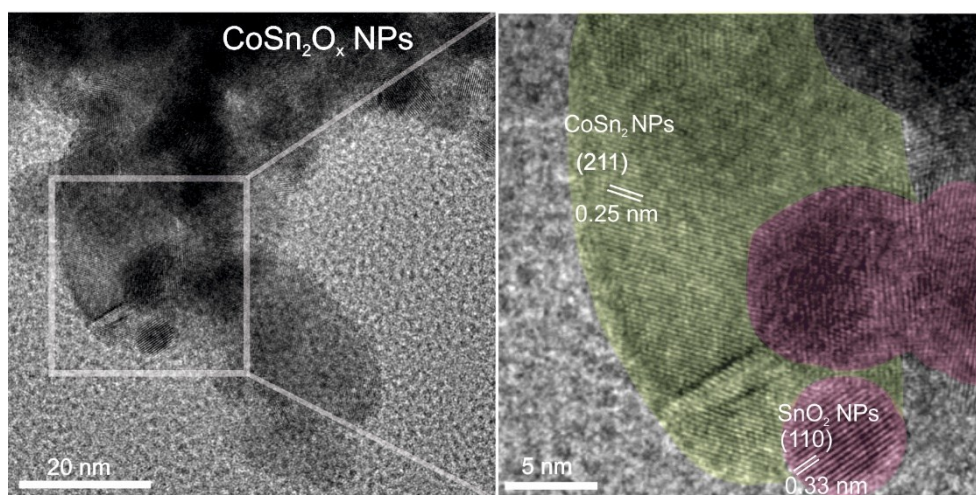

**Figure S3.** HR-TEM images of CoSn<sub>2</sub>O<sub>x</sub> NPs with d-spacing.



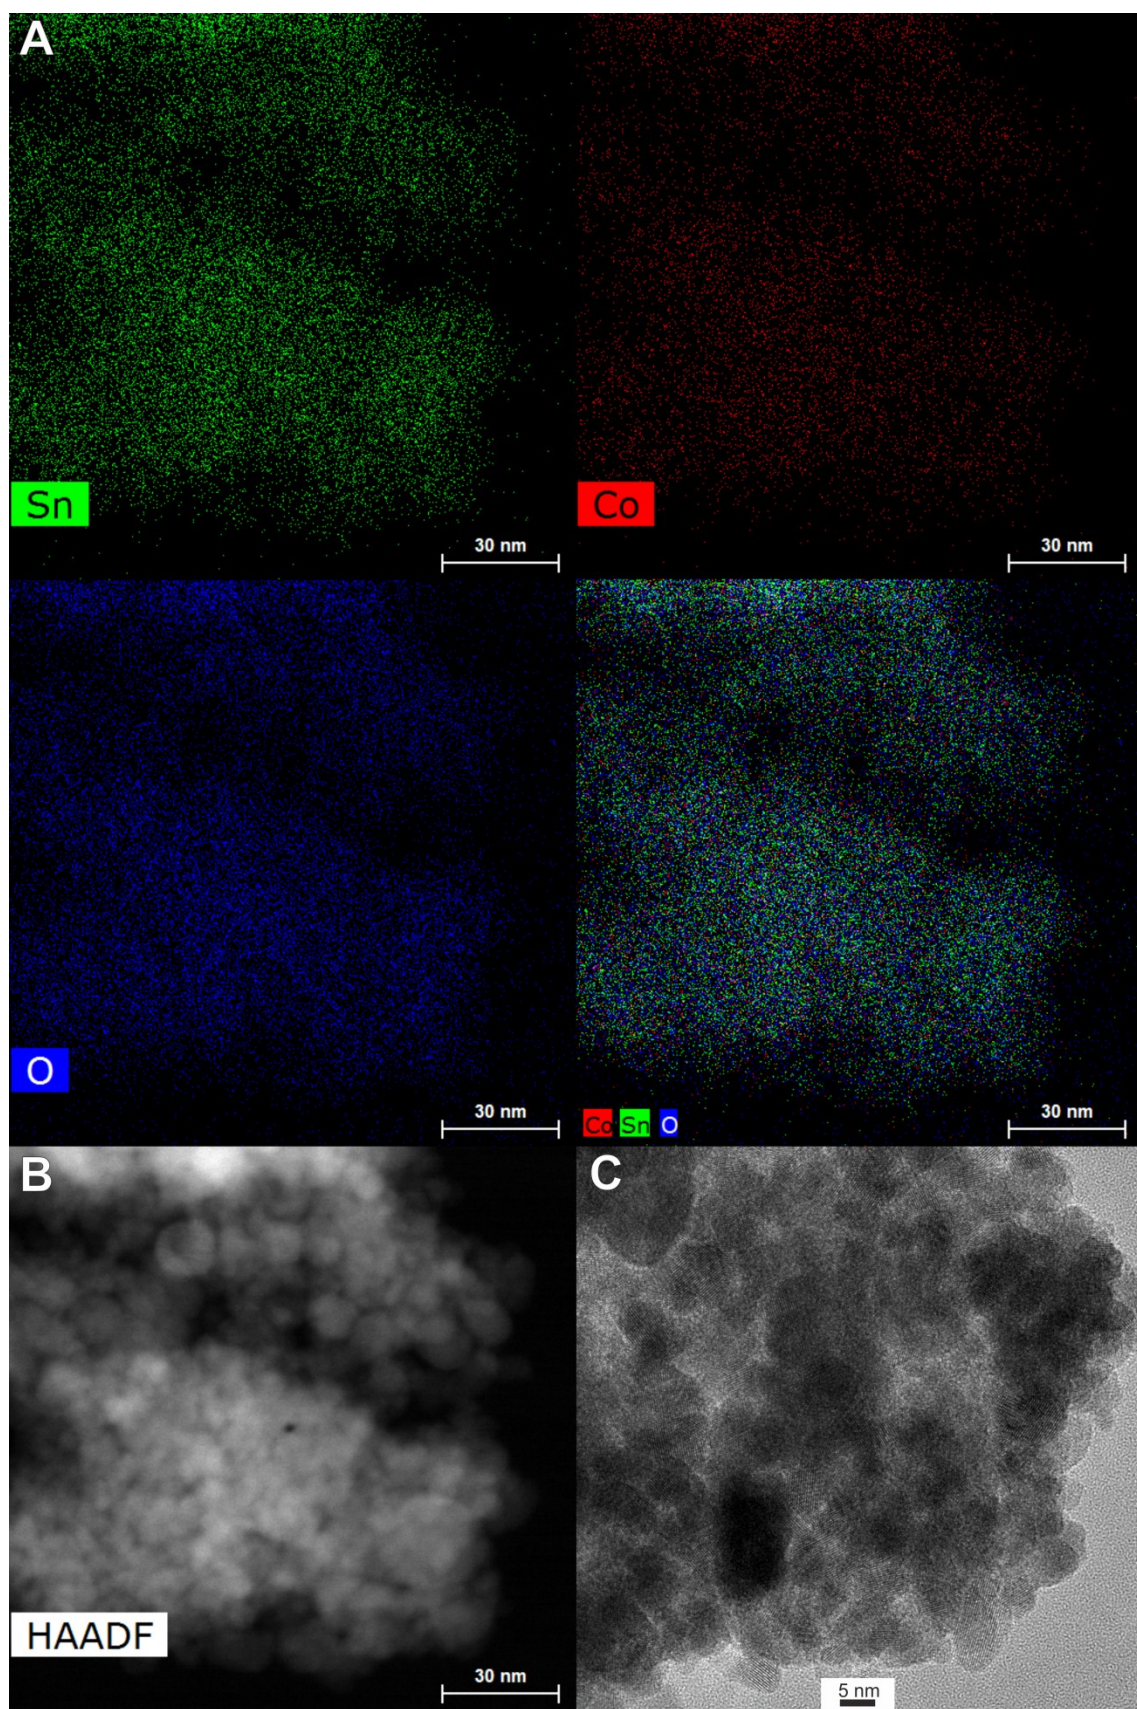

**Figure S4.** (A) Elemental EDX-STEM maps, (B) HAADF-STEM, and (C) HR-TEM images of CoSn<sub>2</sub>O<sub>x</sub> NPs.

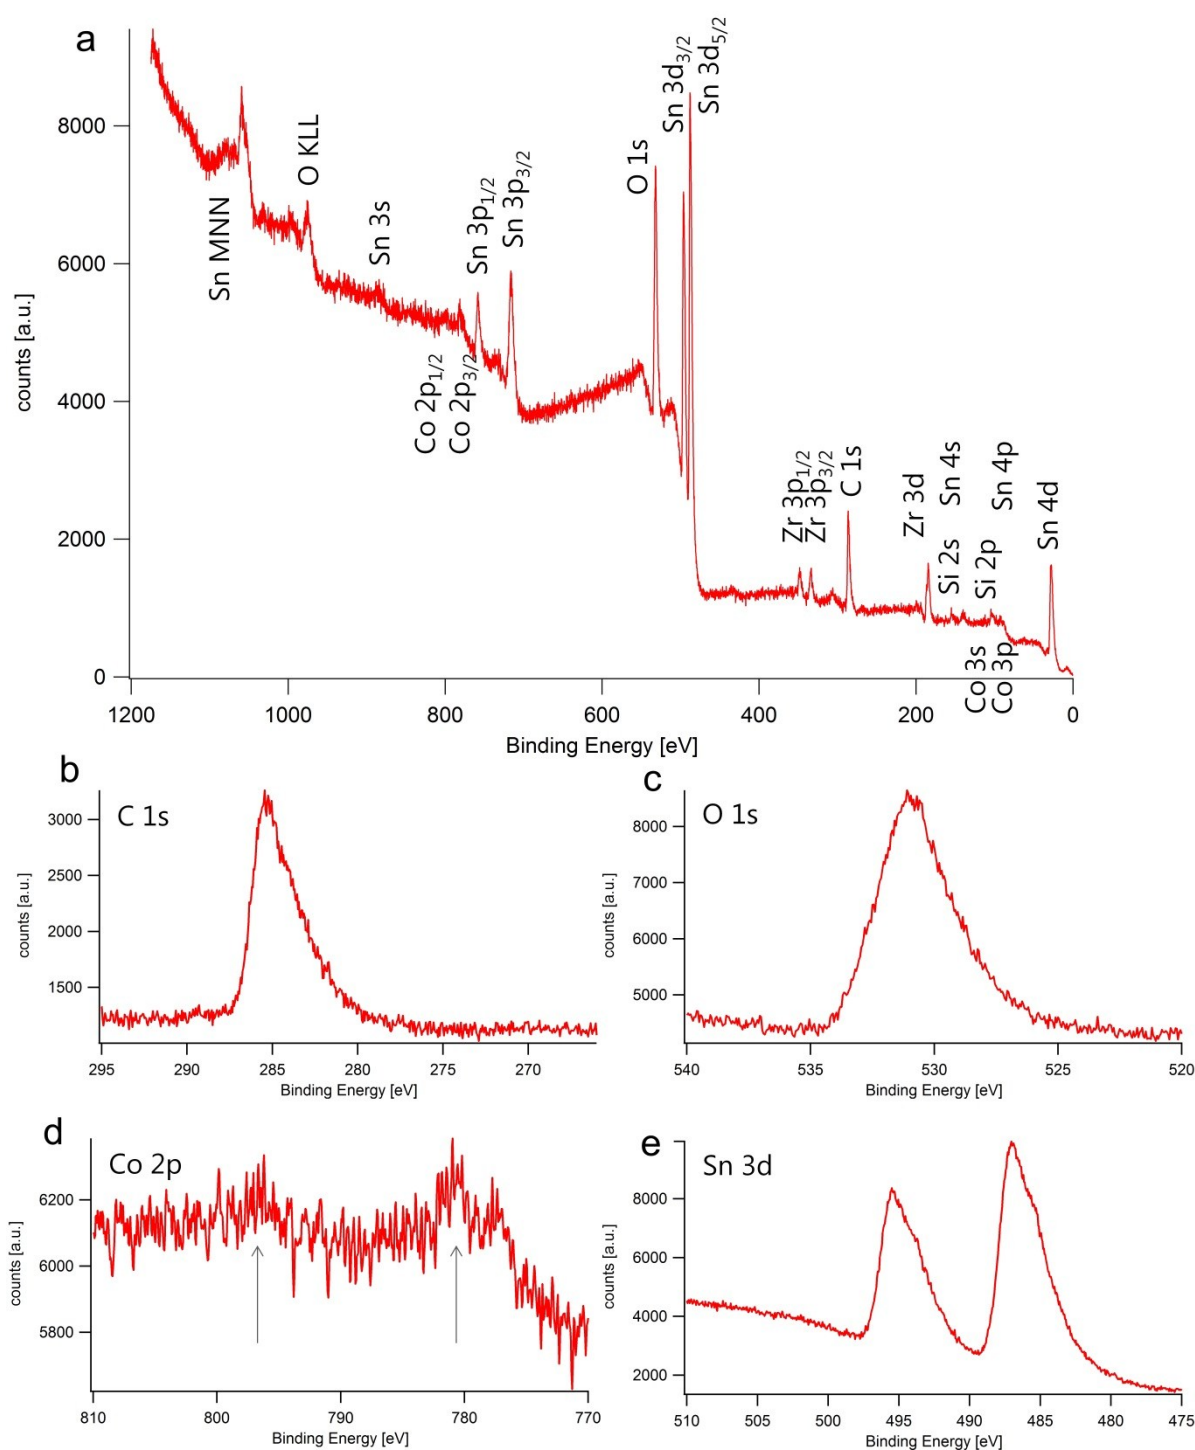

**Figure S5.** (a) XPS spectra of CoSn<sub>2</sub>O<sub>x</sub> NPs. Survey spectrum assigning the peaks to the elements according to <https://srdata.nist.gov/xps/EnergyTypeValSrchr.aspx>. Detail spectra of (b) C 1s, (c) O 1s, (d) Co 2p and (e) Sn 3d, where oxygen as well as carbon show two components, but more important, cobalt and tin are completely oxidized, most probably forming Co(OH)<sub>2</sub> and SnO<sub>2</sub> as follows form a ca. 3 eV and 1.7 eV shift of the individual peaks, respectively.

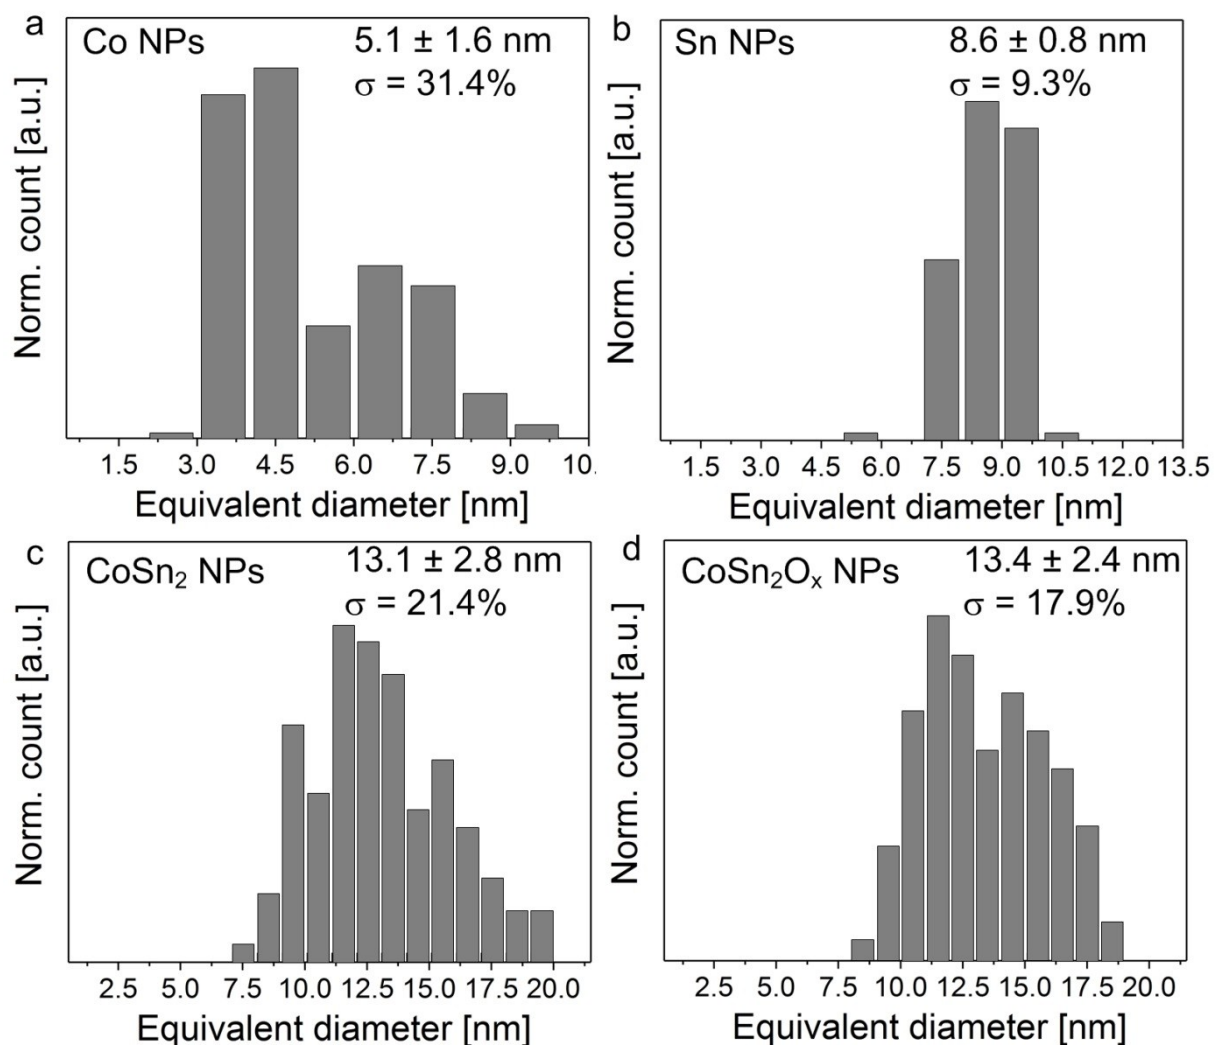

**Figure S6.** Size-distribution histograms of (a) Co NPs, (b) Sn NPs, (c) CoSn<sub>2</sub> NPs and (d) CoSn<sub>2</sub>O<sub>x</sub> NPs. Mean sizes and standard deviations of nanoparticles were determined using PEBBLES (Mondini et al., *Nanoscale*, **2012**, 4, 5356-5372).



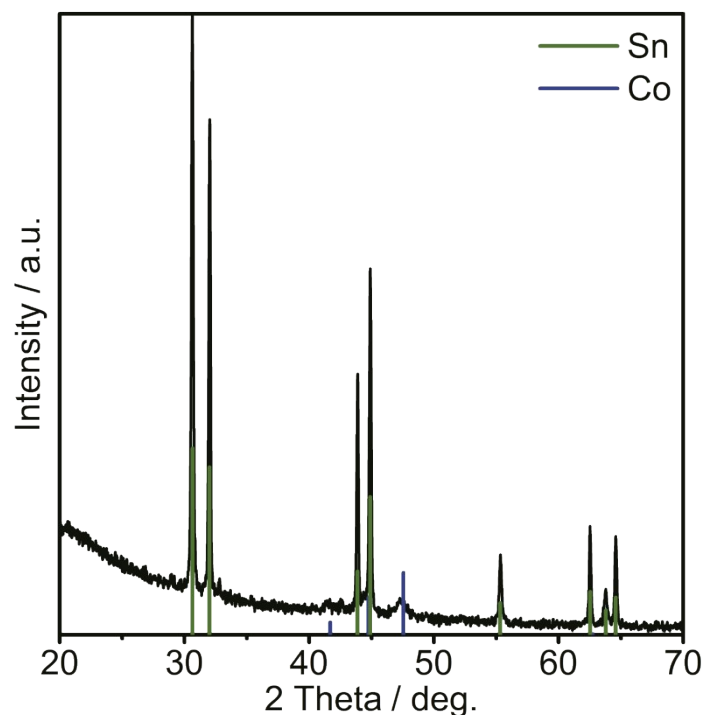

**Figure S7.** XRD pattern of a mixture of bulk Co and Sn powders (molar ratio 1:2) after ball-milling for 4 hours under nitrogen. All reflections can be indexed as belonging to Sn (ICDD PDF entry No.: 00-004-0673) or Co (ICDD PDF entry No.: 00-005-0727).

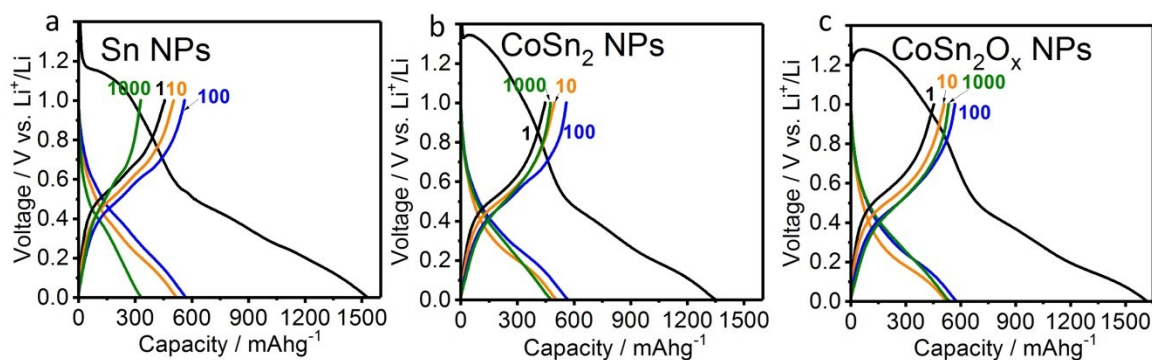

**Figure S8.** Galvanostatic charge/discharge curves with full capacity range for (a) Sn NPs, (b)  $\text{CoSn}_2$  NPs, and (c)  $\text{CoSn}_2\text{O}_x$  NPs measured during 1<sup>st</sup>, 10<sup>th</sup>, 100<sup>th</sup> and 1000<sup>th</sup> cycle at a current density of 1984 mA g<sup>-1</sup>.



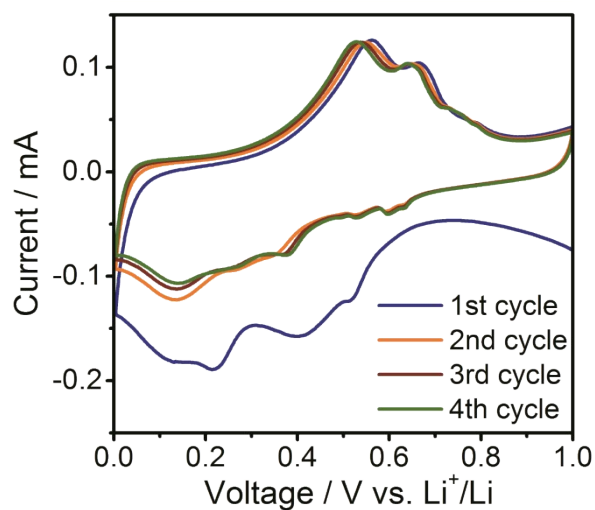

**Figure S9.** Cyclic voltammograms of crystalline Sn NPs in a lithium-ion half-cell using a scan rate of  $0.1 \text{ mV s}^{-1}$  in the potential range of 0.005–1.0 V.

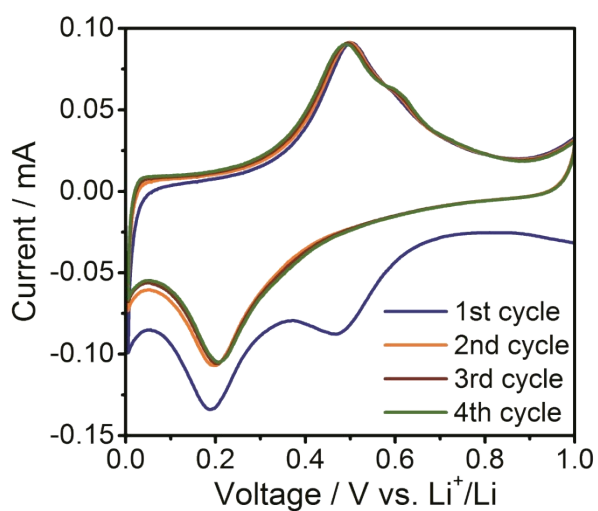

**Figure S10.** Cyclic voltammograms of  $\text{CoSn}_2$  NPs in a lithium-ion half-cell using a scan rate of  $0.1 \text{ mV s}^{-1}$  in the potential range of 0.005–1.0 V.

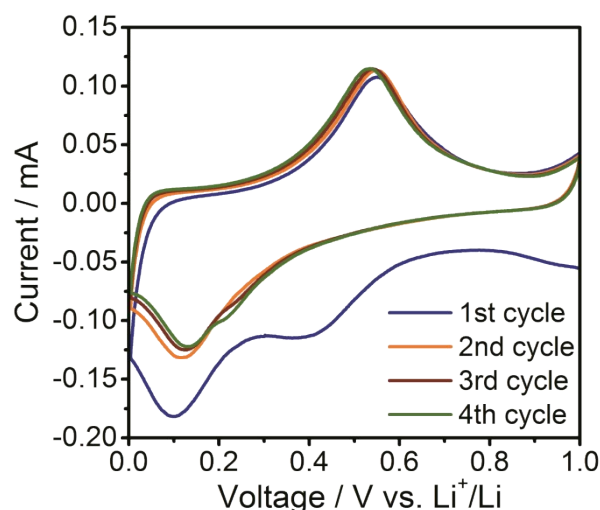

**Figure S11.** Cyclic voltammograms of  $\text{CoSn}_2\text{O}_x$  NPs in a lithium-ion half-cell using a scan rate of  $0.1 \text{ mV s}^{-1}$  in the potential range of 0.005–1.0 V.

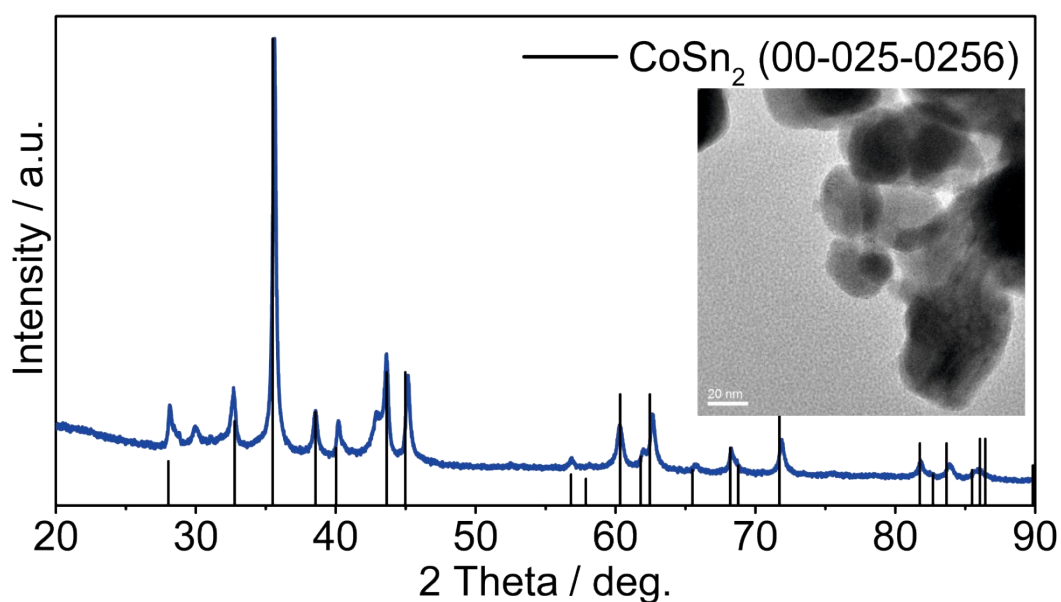

**Figure S12.** XRD pattern (with TEM image as inset) of  $\text{CoSn}_2$  NPs prepared by wet-chemical synthesis. The two unindexed peaks at  $30^\circ$  and  $43^\circ$  might correspond to  $\text{SnO}$  and  $\text{CoO}$ . For synthesizing  $\text{CoSn}_2$  NPs wet-chemically  $\text{SnCl}_2$  (1.33 mmol) and  $\text{CoCl}_2$  (0.67 mmol) dissolved in NMP (3 mL) were injected into a solution of  $\text{NaBH}_4$  in NMP (16 mmol in 17 mL) at  $150^\circ\text{C}$  and kept at this temperature for 1 hour.

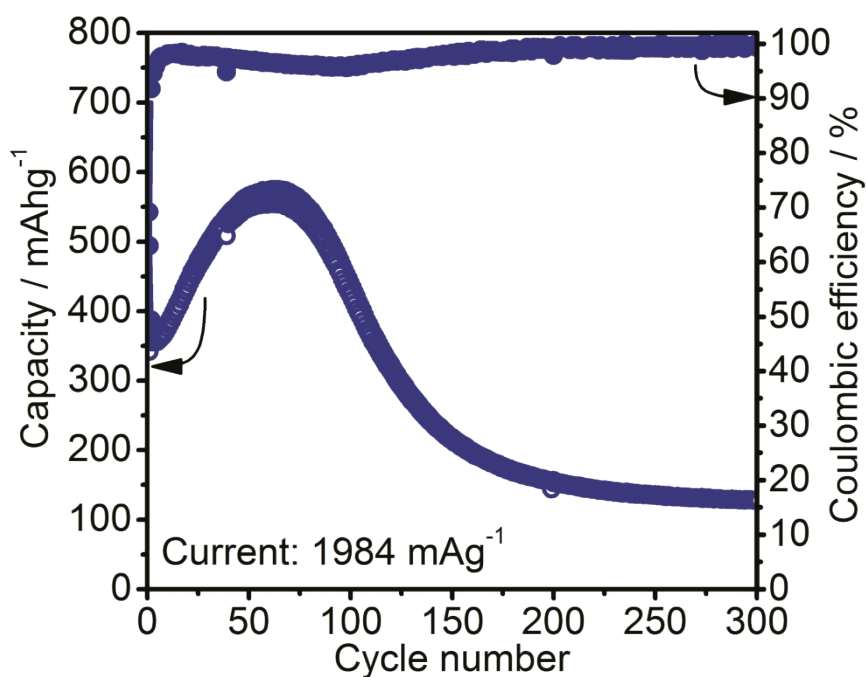

**Figure S13.** Cycling stability of CoSn<sub>2</sub> NPs prepared by wet-chemical synthesis in lithium-ion half-cells using a current of 1984 mA g<sup>-1</sup> in the potential range of 0.005–2.0 V.

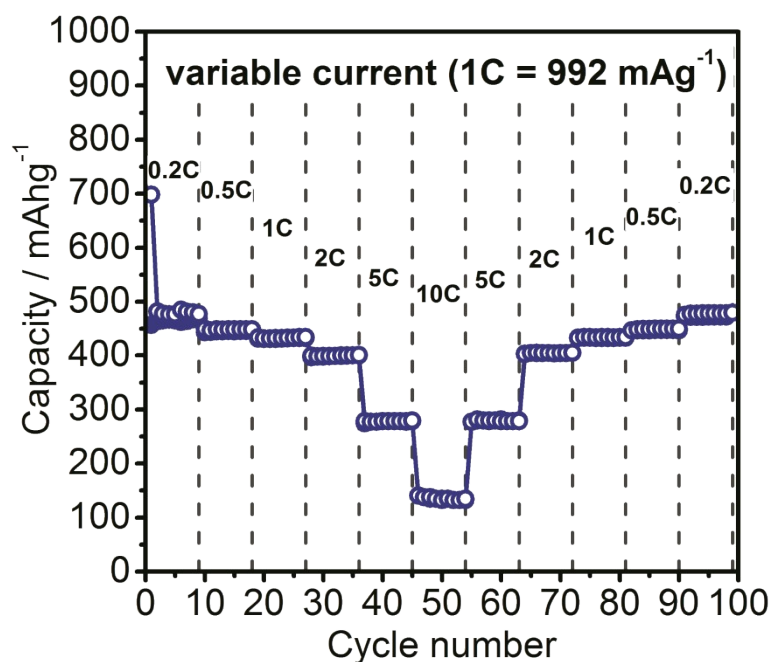

**Figure S14.** Rate capability tests for graphite in lithium-ion half-cells within the potential range of 0.005–1.0 V using the same conditions as for Co-Sn-based NPs in Figure 4.

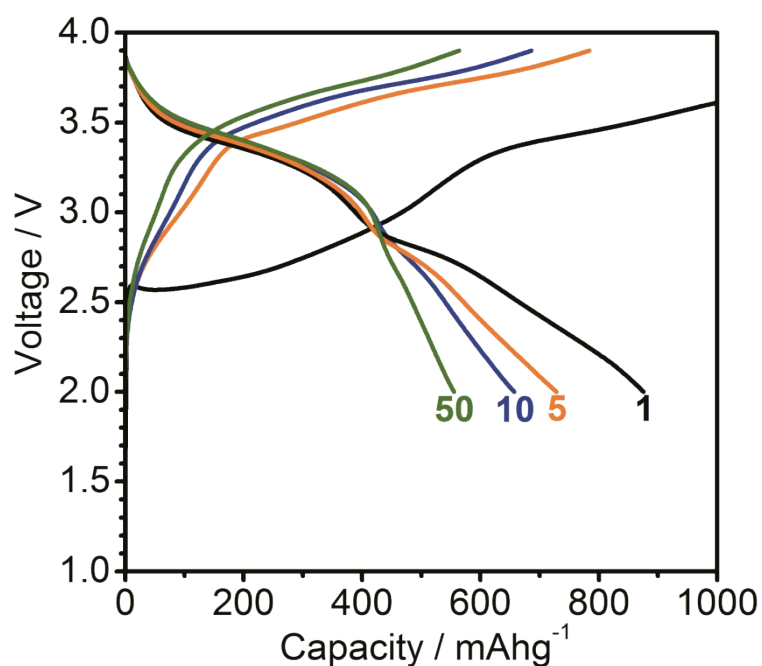

**Figure S15.** Galvanostatic charge/discharge curves for a  $\text{CoSn}_2\text{O}_x/\text{LiCoO}_2$  full-cell. Cells were cycled with a current of  $500 \text{ mA g}^{-1}$  in the potential range of 2.0–3.9 V. The specific capacities and currents correspond to the mass of the  $\text{CoSn}_2\text{O}_x$  NPs.

**Table S1.** Comparison of the electrochemical performance of  $\text{CoSn}_2\text{O}_x$  NPs (present work) with other reported systems as anode materials for LIBs.

| Anode material                                                           | Current density ( $\text{mA g}^{-1}$ ) | Initial capacity ( $\text{mAh g}^{-1}$ ) | Retained capacity ( $\text{mAh g}^{-1}$ ) | Cycle number | Potential range (V vs. $\text{Li}^+/\text{Li}$ ) |
|--------------------------------------------------------------------------|----------------------------------------|------------------------------------------|-------------------------------------------|--------------|--------------------------------------------------|
| $\text{CoSn}_2\text{O}_x$ NPs (present work)                             | 1984                                   | 450<br>(570 at cycle 100)                | 525                                       | 1500         | 0.005–1.0 V                                      |
| $\text{CoSnO}_3@\text{GN}^1$                                             | 2000                                   | ~708                                     | 566                                       | 1500         | 0.005–3.0 V                                      |
| Co–Sn/carbon nanofibers composite <sup>2</sup>                           | 161                                    | 700                                      | 560                                       | 80           | 0.02–2.8 V                                       |
| SnFeCo alloy composite <sup>3</sup>                                      | 50                                     | 585                                      | 507                                       | 50           | 0.02–1.5 V                                       |
| $\text{Co}_3\text{Sn}_2@\text{Co}$ /nitrogen doped graphene <sup>4</sup> | 250                                    | 1600                                     | 1615                                      | 100          | 0.005–3 V                                        |



|                                                                      |      |                       |       |      |             |
|----------------------------------------------------------------------|------|-----------------------|-------|------|-------------|
| CoSn <sub>x</sub> @C-PAn <sup>5</sup>                                | 200  | 2038                  | 2038  | 100  | 0.005–3 V   |
| meso-Co <sub>0.3</sub> Sn <sub>0.7</sub> <sup>6</sup>                | 50   | 663                   | 530   | 50   | 0.001–2.0 V |
| Sn–Co nanoalloy<br>embedded in porous<br>N-doped carbon <sup>7</sup> | 2000 | 472                   | 472   | 500  | 0.01–3V     |
| Sn-Co-graphene<br>composites <sup>8</sup>                            | 500  | 672                   | 560   | 60   | 0.01–3 V    |
| nano Sn-C <sup>9</sup>                                               | 3000 | ~450 (at<br>cycle 50) | 536.5 | 1000 | 0.01–2.5 V  |
| nano Sn-C <sup>10</sup>                                              | 4000 | ~390                  | 410   | 1000 | 0.02–3.0 V  |
| nano Sn-C <sup>11</sup>                                              | 200  | 757                   | 722   | 200  | 0.01–2.0 V  |
| Ni <sub>3</sub> Sn <sub>2</sub><br>microcages <sup>12</sup>          | 570  | ~304                  | ~304  | 1000 | 0.01–2.0 V  |
| Sn NCs <sup>13</sup>                                                 | 1000 | ~800                  | 550   | 100  | 0.005–2.0 V |
| nano Sn-C <sup>14</sup>                                              | 200  | ~710                  | ~710  | 130  | 0–3.0 V     |
| Sn-carbon/silica <sup>15</sup>                                       | 300  | ~440                  | ~440  | 100  | 0–2.5 V     |

**Table S2.** Comparison of the theoretical volumetric capacities for graphite or CoSn<sub>2</sub>O<sub>x</sub>-based anodes in full-cells with LiCoO<sub>2</sub> cathode.

| System                                               | Capacity<br>[mAh/g] | Density<br>[g/cm <sup>3</sup> ] | Vol. capacity<br>[mAh/cm <sup>3</sup> ] | Vol. cell capacity<br>[mAh/cm <sup>3</sup> ] | Discharge<br>voltage [V] | Vol. energy<br>density [Wh/L] |
|------------------------------------------------------|---------------------|---------------------------------|-----------------------------------------|----------------------------------------------|--------------------------|-------------------------------|
| Graphite/LiCoO <sub>2</sub>                          | 372/140             | 2.2/5.1                         | 818/714                                 | 381                                          | 3.55                     | 1353                          |
| CoSn <sub>2</sub> O <sub>x</sub> /LiCoO <sub>2</sub> | 576/140             | 7.6*/5.1                        | 4378/714                                | 614                                          | 3.15                     | 1934                          |

\*based on the bulk densities of Sn (7.3 g/cm<sup>3</sup>) and Co (8.9 g/cm<sup>3</sup>).

## References

1. C. Wu, J. Maier and Y. Yu, *Adv. Funct. Mater.*, 2015, **25**, 3488-3496.
2. B.-O. Jang, S.-H. Park and W.-J. Lee, *J. Alloys Compd.*, 2013, **574**, 325-330.
3. X. Li, X. He, Y. Xu, L. Huang, J. Li, S. Sun and J. Zhao, *J. Mater. Chem. A*, 2015, **3**, 3794-3800.
4. N. Mahmood, C. Zhang, F. Liu, J. Zhu and Y. Hou, *ACS Nano*, 2013, **7**, 10307-10318.
5. N. Mahmood, J. Zhu, S. Rehman, Q. Li and Y. Hou, *Nano Lett.*, 2015, **15**, 755-765.
6. G. O. Park, J. Yoon, J. K. Shon, Y. S. Choi, J. G. Won, S. B. Park, K. H. Kim, H. Kim, W.-S. Yoon and J. M. Kim, *Adv. Funct. Mater.*, 2016, **26**, 2800-2808.
7. X. Shi, H. Song, A. Li, X. Chen, J. Zhou and Z. Ma, *J. Mater. Chem. A*, 2017, **5**, 5873-5879.
8. J. Zhu, D. Wang, T. Liu and C. Guo, *Electrochim. Acta*, 2014, **125**, 347-353.
9. X. Huang, S. Cui, J. Chang, P. B. Hallac, C. R. Fell, Y. Luo, B. Metz, J. Jiang, P. T. Hurley and J. Chen, *Angew. Chem. Int. Ed.*, 2015, **54**, 1490-1493.
10. N. Zhang, Q. Zhao, X. Han, J. Yang and J. Chen, *Nanoscale*, 2014, **6**, 2827-2832.
11. Z. Zhu, S. Wang, J. Du, Q. Jin, T. Zhang, F. Cheng and J. Chen, *Nano Lett.*, 2014, **14**, 153-157.
12. J. Liu, Y. Wen, P. A. van Aken, J. Maier and Y. Yu, *Nano Lett.*, 2014, **14**, 6387-6392.
13. K. Kravchyk, L. Protesescu, M. I. Bodnarchuk, F. Krumeich, M. Yarema, M. Walter, C. Guntlin and M. V. Kovalenko, *J. Am. Chem. Soc.*, 2013, **135**, 4199-4202.
14. Y. Xu, Q. Liu, Y. Zhu, Y. Liu, A. Langrock, M. R. Zachariah and C. Wang, *Nano Lett.*, 2013, **13**, 470-474.
15. J. Hwang, S. H. Woo, J. Shim, C. Jo, K. T. Lee and J. Lee, *ACS Nano*, 2013, **7**, 1036-1044.
